# Supplementary material for: Heterogenous CD8+ T Cell Maturation and ‘Polarization’ in Acute and Convalescent COVID-19 Patients
Source: MDPI journal article supplement (doi:10.3390/v14091906), 2022-08-28
Supplement: s1 [file s1]

**Supplementary File.**

**Supplementary Table S1.** Altered relative and absolute rate of major peripheral blood T cell subsets in acute and convalescent COVID-19 patients.

| T cell subset          |   | Acute COVID-19<br>(COV, n = 71) | Convalescent COVID-19<br>(CON, n = 51) | Healthy control<br>(HC, n = 46) | P value   |
|------------------------|---|---------------------------------|----------------------------------------|---------------------------------|-----------|
| T cells<br>CD3+        | % | 74.17 (65.54; 79.45)            | 77.36 (70.70; 80.16)                   | 78.49 (73.81; 80.77)            | p = 0.173 |
|                        |   |                                 |                                        |                                 | p = 0.010 |
|                        |   |                                 |                                        |                                 | p = 0.218 |
|                        | # | 885 (562; 1139)                 | 1345 (1199; 1588)                      | 1270 (1090; 1580)               | p < 0.001 |
| Th cells<br>CD3+CD4+   | % | 47.55 (40.53; 53.83)            | 46.94 (41.97; 51.83)                   | 47.63 (43.82; 52.73)            | p = 0.629 |
|                        |   |                                 |                                        |                                 | p = 0.684 |
|                        |   |                                 |                                        |                                 | p = 0.326 |
|                        | # | 527 (399; 743)                  | 865 (703; 960)                         | 775 (671; 1053)                 | p < 0.001 |
| Tcyt cells<br>CD3+CD8+ | % | 22.70 (18.23; 29.65)            | 26.69 (20.97; 31.68)                   | 24.96 (21.00; 29.56)            | p = 0.021 |
|                        |   |                                 |                                        |                                 | p = 0.137 |
|                        |   |                                 |                                        |                                 | p = 0.365 |
|                        | # | 285 (180; 382)                  | 520 (355; 600)                         | 444 (351; 525)                  | p < 0.001 |
|                        |   |                                 |                                        |                                 | p < 0.001 |
|                        |   |                                 |                                        |                                 | p = 0.175 |

Comments: % – the relative number of T cells within total lymphocyte population; # - absolute number of cells per 1 µL of whole peripheral blood. The data are shown as group median and quartile ranges (Med (Q25; Q75)). Statistical analysis was performed by using the Mann–Whitney U test. Hereinafter, all symbols denote similar parameters in Supplementary Table S2.

**Supplementary Table S2.** Altered relative and absolute number of major CD8+ T cell subsets varied in CD45RA and CD62L expression pattern in acute and convalescent COVID-19 patients.

| T cell subset              |   | Acute COVID-19<br>(COV, n = 71) | Convalescent COVID-19<br>(CON, n = 51) | Healthy control<br>(HC, n = 46) | P value   |
|----------------------------|---|---------------------------------|----------------------------------------|---------------------------------|-----------|
| 'Naïve'<br>Tcyt            | % | 21.07 (12.81; 33.30)            | 32.53 (26.84; 45.47)                   | 27.22 (15.62; 34.92)            | p < 0.001 |
|                            |   |                                 |                                        |                                 | p = 0.477 |
|                            |   |                                 |                                        |                                 | p = 0.001 |
|                            | # | 56 (33; 113)                    | 167 (125; 209)                         | 112 (68; 150)                   | p < 0.001 |
| Central<br>memory<br>Tcyt  | % | 14.46 (9.18; 21.97)             | 14.49 (9.81; 19.11)                    | 10.48 (6.98; 13.22)             | p = 0.858 |
|                            |   |                                 |                                        |                                 | p = 0.003 |
|                            |   |                                 |                                        |                                 | p = 0.004 |
|                            | # | 46 (24; 77)                     | 72 (46; 87)                            | 39 (28; 68)                     | p = 0.002 |
| Effector<br>memory<br>Tcyt | % | 35.36 (26.12; 46.58)            | 36.00 (30.24; 39.54)                   | 35.71 (26.11; 43.61)            | p = 0.842 |
|                            |   |                                 |                                        |                                 | p = 0.793 |
|                            |   |                                 |                                        |                                 | p = 0.879 |
|                            | # | 86 (57; 135)                    | 164 (113; 214)                         | 149 (101; 200)                  | p < 0.001 |

|               |   |                     |                     |                      |           |
|---------------|---|---------------------|---------------------|----------------------|-----------|
| TEMRA<br>Tcyt |   |                     |                     |                      | p < 0.001 |
|               |   |                     |                     |                      | p = 0.302 |
|               | % | 19.24 (8.43; 34.45) | 11.79 (5.39; 20.24) | 27.10 (16.21; 35.92) | p = 0.003 |
|               |   |                     |                     |                      | p = 0.028 |
| Tcyt          |   |                     |                     |                      | p < 0.001 |
|               |   |                     |                     |                      | p = 0.297 |
|               | # | 39 (17; 79)         | 57 (25; 93)         | 109 (60; 170)        | p < 0.001 |
|               |   |                     |                     |                      | p < 0.001 |

**Supplementary Table S3.** Altered relative numbers of EM and TEMRA CD8+ T cell subsets varied in CD27 and CD28 expression pattern in acute and convalescent COVID-19 patients.

| Tcyt subset:                         | Acute COVID-19<br>(COV, n = 71) | Convalescent COVID-19<br>(CON, n = 51) | Healthy control<br>(HC, n = 46) | P value   |
|--------------------------------------|---------------------------------|----------------------------------------|---------------------------------|-----------|
| <b>Effector memory Tcyt subsets:</b> |                                 |                                        |                                 |           |
| EM1,<br>CD27+CD28+                   | 33.53 (23.65; 49.34)            | 42.43 (29.30; 54.47)                   | 52.10 (42.05; 66.44)            | p = 0.008 |
|                                      |                                 |                                        |                                 | p < 0.001 |
|                                      |                                 |                                        |                                 | p = 0.010 |
| EM2,<br>CD27+CD28-                   | 11.79 (7.06; 17.71)             | 13.50 (9.65; 18.04)                    | 13.43 (9.45; 17.28)             | p = 0.172 |
|                                      |                                 |                                        |                                 | p = 0.360 |
|                                      |                                 |                                        |                                 | p = 0.665 |
| EM3,<br>CD27-CD28-                   | 46.18 (25.76; 61.25)            | 38.16 (18.35; 52.37)                   | 28.67 (10.74; 39.05)            | p = 0.013 |
|                                      |                                 |                                        |                                 | p < 0.001 |
|                                      |                                 |                                        |                                 | p = 0.056 |
| EM4,<br>CD27-CD28+                   | 5.45 (3.81; 7.78)               | 6.49 (4.20; 8.48)                      | 5.38 (3.62; 6.83)               | p = 0.256 |
|                                      |                                 |                                        |                                 | p = 0.558 |
|                                      |                                 |                                        |                                 | p = 0.086 |
| <b>TEMRA Tcyt subsets:</b>           |                                 |                                        |                                 |           |
| pE1,<br>CD27+CD28+                   | 5.53 (2.70; 9.38)               | 5.35 (2.34; 13.77)                     | 12.60 (8.36; 21.53)             | p = 0.490 |
|                                      |                                 |                                        |                                 | p < 0.001 |
|                                      |                                 |                                        |                                 | p < 0.001 |
| pE2,<br>CD27+CD28-                   | 14.18 (8.48; 24.66)             | 17.53 (9.85; 25.19)                    | 18.68 (11.54; 25.09)            | p = 0.252 |
|                                      |                                 |                                        |                                 | p = 0.076 |
|                                      |                                 |                                        |                                 | p = 0.598 |
| Effectors,<br>CD27-CD28-             | 78.80 (64.22; 86.16)            | 76.59 (48.71; 84.22)                   | 67.03 (54.39; 77.55)            | p = 0.346 |
|                                      |                                 |                                        |                                 | p = 0.002 |
|                                      |                                 |                                        |                                 | p = 0.100 |

**Supplementary Table S4.** Chemokine receptor profiles on major CD8+ T cell subsets varied in CD45RA and CD62L expression pattern in acute and convalescent COVID-19 patients.

| Tcyt subset:         | Acute COVID-19<br>(COV, n = 71) | Convalescent<br>COVID-19<br>(CON, n = 51) | Healthy control<br>(HC, n = 46) | P value   |
|----------------------|---------------------------------|-------------------------------------------|---------------------------------|-----------|
| <b>'Naïve' Tcyt:</b> |                                 |                                           |                                 |           |
| CXCR5+               | 0.80 (0.38; 1.28)               | 1.08 (0.83; 1.44)                         | 0.53 (0.31; 0.84)               | p = 0.004 |
|                      |                                 |                                           |                                 | p = 0.011 |
|                      |                                 |                                           |                                 | p < 0.001 |
| CXCR3+               | 45.55 (35.96; 58.28)            | 71.89 (64.39; 79.41)                      | 81.63 (76.56; 85.86)            | p < 0.001 |
|                      |                                 |                                           |                                 | p < 0.001 |
|                      |                                 |                                           |                                 | p < 0.001 |
| CCR6+                | 1.31 (0.91; 2.12)               | 1.76 (1.26; 2.96)                         | 1.16 (0.69; 1.89)               | p = 0.004 |
|                      |                                 |                                           |                                 | p = 0.194 |

|                   |                      |                      |                      |           |
|-------------------|----------------------|----------------------|----------------------|-----------|
|                   |                      |                      |                      | p < 0.001 |
| CCR4+             | 3.05 (1.33; 6.07)    | 1.94 (0.79; 4.78)    | 4.18 (2.25; 10.19)   | p = 0.106 |
|                   |                      |                      |                      | p = 0.005 |
|                   |                      |                      |                      | p < 0.001 |
| <b>CM Tcyt:</b>   |                      |                      |                      |           |
| CXCR5+            | 6.35 (4.00; 11.83)   | 6.07 (4.29; 8.76)    | 3.22 (1.88; 4.67)    | p = 0.746 |
|                   |                      |                      |                      | p < 0.001 |
|                   |                      |                      |                      | p < 0.001 |
| CXCR3+            | 66.47 (57.60; 76.26) | 82.76 (77.84; 87.30) | 88.29 (80.48; 92.84) | p < 0.001 |
|                   |                      |                      |                      | p < 0.001 |
|                   |                      |                      |                      | p = 0.003 |
| CCR6+             | 9.49 (6.71; 13.85)   | 13.91 (8.70; 20.15)  | 12.73 (8.22; 19.58)  | p = 0.002 |
|                   |                      |                      |                      | p = 0.012 |
|                   |                      |                      |                      | p = 0.680 |
| CCR4+             | 31.14 (22.38; 42.89) | 26.67 (19.32; 35.50) | 37.62 (28.77; 52.25) | p = 0.067 |
|                   |                      |                      |                      | p = 0.015 |
|                   |                      |                      |                      | p < 0.001 |
| <b>EM Tcyt:</b>   |                      |                      |                      |           |
| CXCR5+            | 1.60 (0.91; 2.69)    | 1.07 (0.63; 1.54)    | 0.85 (0.34; 1.37)    | p = 0.007 |
|                   |                      |                      |                      | p < 0.001 |
|                   |                      |                      |                      | p = 0.119 |
| CXCR3+            | 43.05 (26.85; 60.62) | 72.11 (66.37; 81.11) | 86.67 (77.83; 90.62) | p < 0.001 |
|                   |                      |                      |                      | p < 0.001 |
|                   |                      |                      |                      | p < 0.001 |
| CCR6+             | 17.11 (8.39; 25.39)  | 29.79 (19.09; 43.85) | 26.35 (12.84; 47.73) | p < 0.001 |
|                   |                      |                      |                      | p = 0.001 |
|                   |                      |                      |                      | p = 0.656 |
| CCR4+             | 9.71 (6.90; 16.06)   | 9.31 (5.34; 14.46)   | 15.39 (10.67; 26.78) | p = 0.351 |
|                   |                      |                      |                      | p < 0.001 |
|                   |                      |                      |                      | p < 0.001 |
| <b>TEMRA Tcyt</b> |                      |                      |                      |           |
| CXCR5+            | 0.05 (0.01; 0.18)    | 0.16 (0.06; 0.29)    | 0.14 (0.06; 0.22)    | p = 0.003 |
|                   |                      |                      |                      | p = 0.004 |
|                   |                      |                      |                      | p = 0.421 |
| CXCR3+            | 21.24 (11.55; 35.57) | 51.32 (44.52; 65.05) | 71.28 (60.96; 79.82) | p < 0.001 |
|                   |                      |                      |                      | p < 0.001 |
|                   |                      |                      |                      | p < 0.001 |
| CCR6+             | 2.50 (0.91; 6.01)    | 11.40 (3.27; 20.37)  | 4.99 (1.39; 10.15)   | p < 0.001 |
|                   |                      |                      |                      | p = 0.058 |
|                   |                      |                      |                      | p = 0.001 |
| CCR4+             | 1.33 (0.71; 2.62)    | 1.10 (0.61; 2.10)    | 2.61 (1.19; 6.39)    | p = 0.377 |
|                   |                      |                      |                      | p < 0.001 |
|                   |                      |                      |                      | p < 0.001 |

**Supplementary Table S5.** Imbalance in peripheral blood major maturation CD8+T cell subsets Tc1, Tc2, Tc17 and Tc17.1 cell in acute and convalescent COVID-19 patients.

| Tcyt subset:         | Acute COVID-19<br>(COV. n = 71) | Convalescent<br>COVID-19<br>(CON. n = 51) | Healthy control<br>(HC, n = 46) | P value   |
|----------------------|---------------------------------|-------------------------------------------|---------------------------------|-----------|
| <b>'Naïve' Tcyt:</b> |                                 |                                           |                                 |           |
| Tc1                  | 44.36 (34.79; 55.31)            | 70.05 (62.07; 76.17)                      | 80.38 (74.14; 84.69)            | p < 0.001 |

|                    |                      |                      |                      |           |
|--------------------|----------------------|----------------------|----------------------|-----------|
|                    |                      |                      |                      | p < 0.001 |
|                    |                      |                      |                      | p < 0.001 |
| <b>Tc2</b>         | 53.32 (40.57; 63.42) | 27.52 (20.07; 34.53) | 18.19 (13.95; 23.08) | p < 0.001 |
|                    |                      |                      |                      | p < 0.001 |
| <b>Tc17</b>        | 0.26 (0.18; 0.70)    | 0.42 (0.27; 0.73)    | 0.19 (0.08; 0.33)    | p = 0.068 |
|                    |                      |                      |                      | p = 0.009 |
|                    |                      |                      |                      | p < 0.001 |
| <b>Tc17.1</b>      | 0.66 (0.38; 1.12)    | 1.03 (0.65; 1.79)    | 0.87 (0.44; 1.41)    | p < 0.001 |
|                    |                      |                      |                      | p = 0.149 |
|                    |                      |                      |                      | p = 0.021 |
| <b>CM Tcyt:</b>    |                      |                      |                      |           |
| <b>Tc1</b>         | 51.84 (45.18; 62.80) | 63.72 (59.88; 71.23) | 71.74 (63.25; 78.14) | p < 0.001 |
|                    |                      |                      |                      | p < 0.001 |
|                    |                      |                      |                      | p = 0.002 |
| <b>Tc2</b>         | 27.36 (20.17; 39.67) | 13.53 (8.50; 18.59)  | 8.78 (4.20; 16.42)   | p < 0.001 |
|                    |                      |                      |                      | p < 0.001 |
|                    |                      |                      |                      | p = 0.012 |
| <b>Tc17</b>        | 2.63 (1.73; 4.36)    | 3.16 (1.50; 4.73)    | 1.66 (1.03; 3.30)    | p = 0.677 |
|                    |                      |                      |                      | p = 0.007 |
|                    |                      |                      |                      | p = 0.010 |
| <b>Tc17.1</b>      | 4.88 (3.73; 7.25)    | 10.52 (6.64; 13.12)  | 11.09 (5.80; 16.87)  | p < 0.001 |
|                    |                      |                      |                      | p < 0.001 |
|                    |                      |                      |                      | p = 0.492 |
| <b>EM Tcyt:</b>    |                      |                      |                      |           |
| <b>Tc1</b>         | 35.37 (20.50; 46.20) | 48.60 (37.79; 59.56) | 60.36 (43.18; 71.37) | p < 0.001 |
|                    |                      |                      |                      | p < 0.001 |
|                    |                      |                      |                      | p = 0.008 |
| <b>Tc2</b>         | 40.41 (27.71; 64.14) | 13.73 (9.09; 23.83)  | 7.05 (3.89; 11.68)   | p < 0.001 |
|                    |                      |                      |                      | p < 0.001 |
|                    |                      |                      |                      | p < 0.001 |
| <b>Tc17</b>        | 8.13 (4.14; 16.75)   | 8.46 (4.64; 14.27)   | 3.86 (2.23; 7.51)    | p = 0.871 |
|                    |                      |                      |                      | p = 0.001 |
|                    |                      |                      |                      | p < 0.001 |
| <b>Tc17.1</b>      | 5.69 (3.23; 10.77)   | 18.47 (11.92; 28.95) | 23.53 (9.94; 33.59)  | p < 0.001 |
|                    |                      |                      |                      | p < 0.001 |
|                    |                      |                      |                      | p = 0.322 |
| <b>TEMRA Tcyt:</b> |                      |                      |                      |           |
| <b>Tc1</b>         | 20.16 (10.68; 34.03) | 43.38 (35.87; 55.95) | 65.53 (53.76; 74.65) | p < 0.001 |
|                    |                      |                      |                      | p < 0.001 |
|                    |                      |                      |                      | p < 0.001 |
| <b>Tc2</b>         | 75.80 (56.43; 86.20) | 42.51 (27.15; 51.33) | 26.14 (16.78; 36.30) | p < 0.001 |
|                    |                      |                      |                      | p < 0.001 |
|                    |                      |                      |                      | p < 0.001 |
| <b>Tc17</b>        | 1.01 (0.43; 3.77)    | 3.98 (1.38; 8.66)    | 1.17 (0.25; 3.26)    | p = 0.001 |
|                    |                      |                      |                      | p = 0.289 |
|                    |                      |                      |                      | p < 0.001 |
| <b>Tc17.1</b>      | 0.98 (0.35; 1.80)    | 6.23 (1.89; 13.52)   | 3.73 (1.04; 6.87)    | p < 0.001 |
|                    |                      |                      |                      | p < 0.001 |
|                    |                      |                      |                      | p = 0.012 |
